# Supplementary material
Source: PubMed Central journal article supplement (PMC4410546)
Supplement: Supp_Fig1.pdf [file Supp_Fig1.pdf]

## Supplementary Data

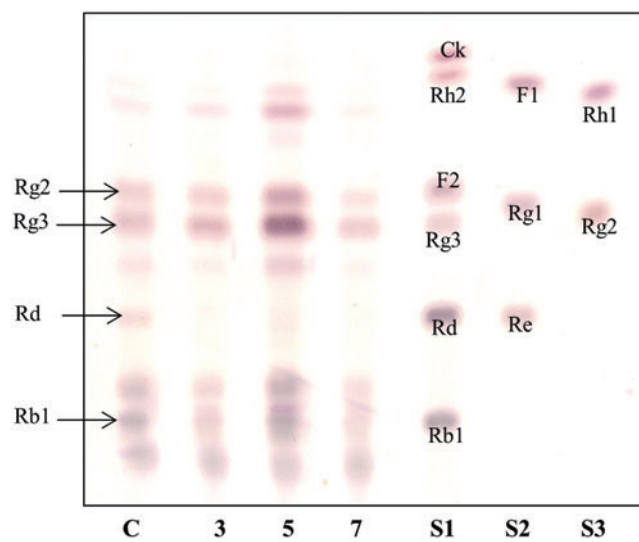

**SUPPLEMENTARY FIG. S1.** Thin layer chromatography (TLC) profile of the biotransformation process. TLC analysis shows that the 5th day incubated sample was good for biotransformation of major ginsenosides into minor ginsenosides such as compound K (Ck). Therefore, we used the 5th day incubated sample for our further experiments. S1, ginsenoside standards: Rb1, Rd, Rg3, F2, Rh2; S2, ginsenoside standards: Re, Rg1, F1; S3, ginsenoside standards: Rg2, Rh1.
